# Supplementary material
Source: publisher figshare collection journal article supplement (https://tandf.figshare.com/ndownloader/files/21785361)
Supplement: Supplementary file 1 [file 21785361]

Inclusion

N = 389

analysed

N = 248

Excluded from analysis

N = 141

D0 n = 247

D14 n = 244

D28 n = 242

M2 n = 243

M4 n = 236

M6 n = 225

Abstinent N = 42

Non abstinent N = 156

Lost to follow-up n = 77

Protocole biasis n = 1

Renounciation n = 10

Region changing n = 1

Non respect of inclusion criteria n = 10

More than one missing follow-up and lost n = 46
